# Supplementary material
Source: publisher site journal article supplement (https://www.spandidos-publications.com/4927/downloadSupplementary)

Figure S1. Supplement effects of ALPSon CP-induced ROS (A) production and (B) loss of MTP in A549 cells. ###P<0.001 vs. controlgroup (one-way ANOVA, followed by Tukey's post-hoc test); \*\*P<0.01 and \*\*\*P<0.001 vs. cisplatin only-treated group (one-way ANOVA, followed by Tukey's post-hoc test). ALPS, *Annona muricata* leaf polysaccharides; CP, cisplatin; Con, control; ROS, reactive oxygen species; MTP, mitochondrial transmembrane potential; ns, not significant.

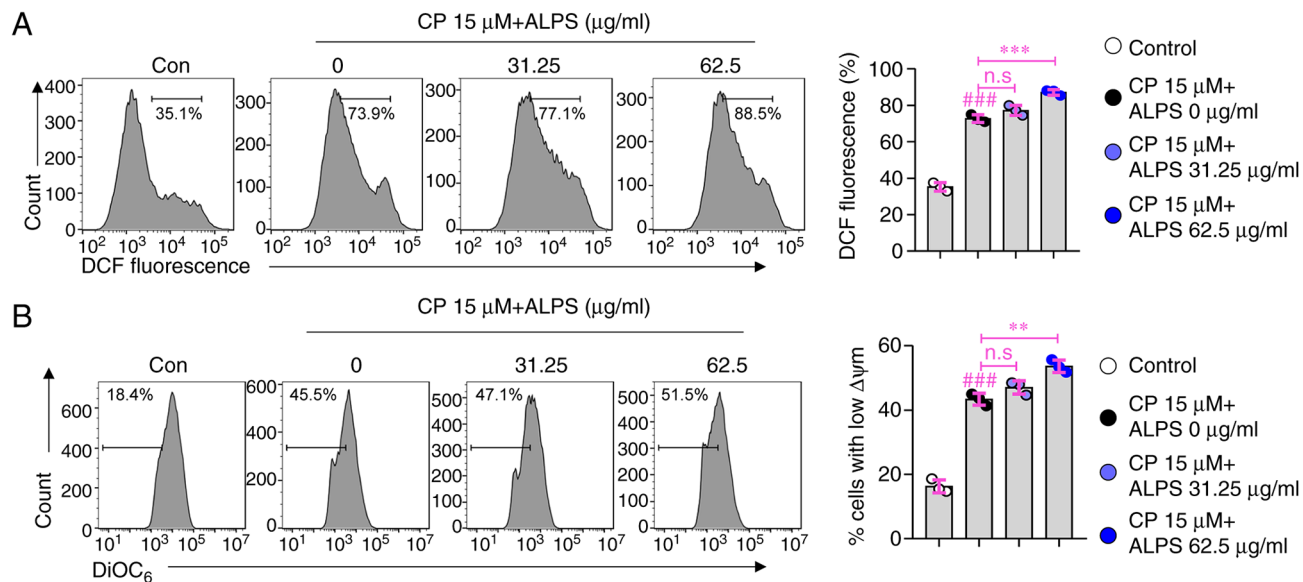

Figure S2. Supplement effects of ALPS on CP-induced ROS (A) production and (B) loss of MTPs in H460 cells. ###P<0.001 vs. controlgroup (one-way ANOVA, followed by Tukey's post-hoc test); \*\*P<0.01 vs. cisplatin only-treated group (one-way ANOVA, followed by Tukey's post-hoc test). ALPS, *Annona muricata* leaf polysaccharides; CP, cisplatin; Con, control; ROS, reactive oxygen species; MTP, mitochondrial transmembrane potential; ns, not significant.

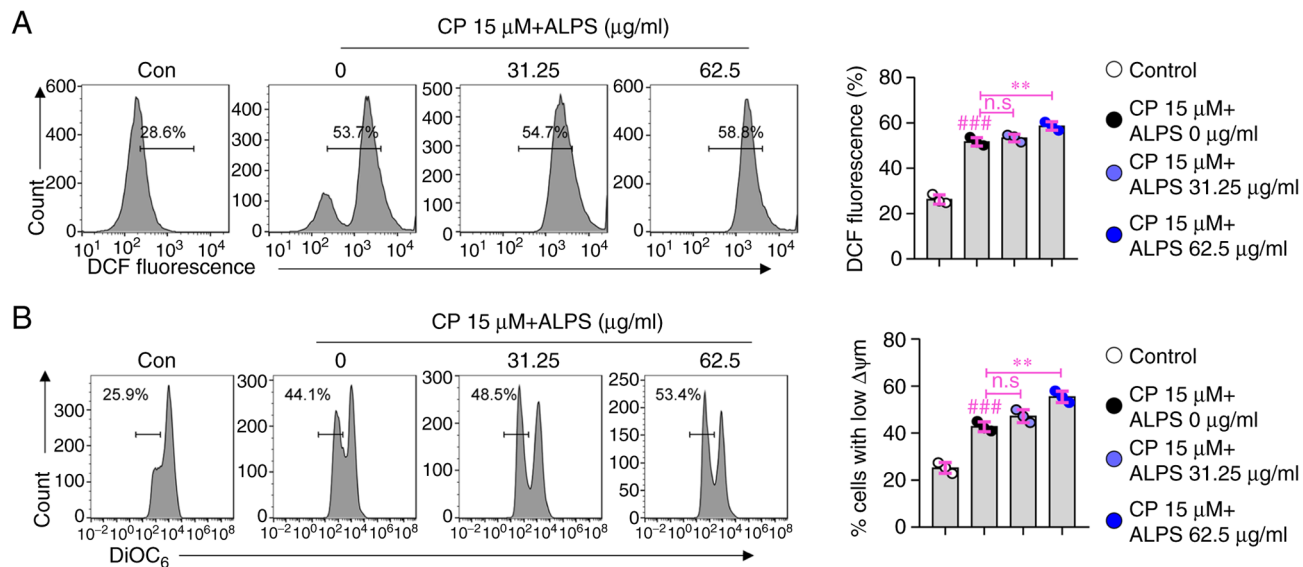

Supplement: Supplementary file 1 [file downloadSupplementary]
